# Supplementary material for: General digital microfluidic platform manipulating dielectric and conductive droplets by dielectrophoresis and electrowetting
Source: Royal Society of Chemistry journal article supplement (doi:10.1039/b816535a), 2009-01-01
Supplement: b816535a.pdf [file b816535a.pdf]

## Electronic Supplementary Information

Table s1 Threshold and splitting voltages of 20 and 50 cSt silicone oil droplets in different gap heights.

| Voltage           | Threshold |        | Splitting |        |
|-------------------|-----------|--------|-----------|--------|
|                   | 20 cSt    | 50 cSt | 20 cSt    | 50 cSt |
| 75 $\mu\text{m}$  | 190 V     | 280 V  | 530 V     | 850 V  |
| 150 $\mu\text{m}$ | 250 V     | 310 V  | 720 V     | 1000 V |
| 225 $\mu\text{m}$ | 300 V     | 350 V  | 950 V     | 1200 V |

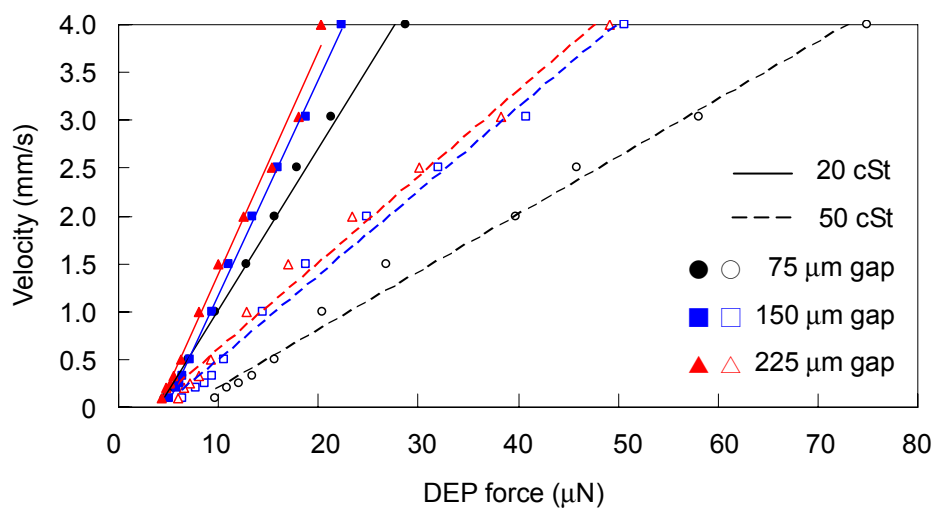

Fig. s1 Velocity curves of 20 and 50 cSt silicone oil droplets against DEP force in different gap heights. Solid lines and solid symbols: 20 cSt silicone oil; dashed lines and hollow symbols: 50 cSt silicone oil; circle symbol: 75  $\mu\text{m}$ -high gap; square symbol: 150  $\mu\text{m}$ -high gap; triangle symbol: 225  $\mu\text{m}$ -high gap.

DEP force was obtained by closed surface  $\Sigma$  integral of the Maxwell stress tensor.<sup>23,24</sup>

$$C_A = \frac{\epsilon_A}{d}, \text{ the specific capacitance of air}$$

$$C_{Oil} = \frac{\epsilon_{Oil}}{t}, \text{ the specific capacitance of oil}$$

$$C_D = \frac{\epsilon_D}{t}, \text{ the specific capacitance of the dielectric layer}$$

$$E_A = \frac{C_D}{C_A + C_D} \frac{V}{d}, \text{ the electric field in air}$$

$$E_{D,A} = \frac{C_A}{C_A + C_D} \frac{V}{t}, \text{ the electric field in the dielectric layer in series with air}$$

$$E_{Oil} = \frac{C_D}{C_{Oil} + C_D} \frac{V}{d}, \text{ the electric field in oil}$$

$$E_{D,O} = \frac{C_{Oil}}{C_{Oil} + C_D} \frac{V}{t}, \text{ the electric field in the dielectric layer in series with oil}$$

The DEP force can be expressed by:

$$F_{DEP} = \left( -\frac{\epsilon_0 \epsilon_D E_{D,A}^2 t}{2} - \frac{\epsilon_0 \epsilon_A E_A^2 d}{2} + \frac{\epsilon_0 \epsilon_D E_{D,O}^2 t}{2} + \frac{\epsilon_0 \epsilon_{Oil} E_{Oil}^2 d}{2} \right) W,$$

which can be further derived as eqn (2).
